# Supplementary material
Source: publisher figshare collection journal article supplement (https://springernature.figshare.com/ndownloader/files/27609236)
Supplement: Supplementary file [file 27609236]

| Library | Total<br>sequences | Analysed<br>sequences | GenBank accessions | Number<br>contigs | Number<br>singletons |
|---------|--------------------|-----------------------|--------------------|-------------------|----------------------|
| 0051    | 960                | 640                   | GW421184- GW421823 | 38                | 457                  |
| 0600    | 960                | 617                   | GW421824- GW422440 | 45                | 451                  |
| 0701    | 960                | 640                   | GW422441- GW423080 | 57                | 355                  |
| 1401    | 960                | 654                   | GW423081- GW423734 | 56                | 433                  |
| 2001    | 960                | 541                   | GW423735- GW424275 | 33                | 375                  |
